# Supplementary material
Source: Research Square preprint supplement (doi:10.21203/rs.3.rs-10060586/v1)
Supplement: Supplementary file 1 [file 389c147a6a96bb575dadb6e8.docx]

**S1 Appendix: Supporting information**

Subfield-specific hippocampal contributions to cognitive map-based navigation in early- and late-onset blindness

Maxime Bleau1,2,3, Mats Donbrowe4,5, Ron Kupers6, Laurence Dricot6, Nikolai Axmacher4,5, Daniel-Robert Chebat7, and Maurice Ptito1,2,3,8,9

1 School of Optometry, Université de Montréal, Montreal, QC, Canada

2 Centre de Recherche Interdisciplinaire en Réadaptation du Montréal métropolitain, Montreal, QC, Canada

3 Centre Interdisciplinaire de Recherche sur le Cerveau et l’Apprentissage (CIRCA), Université de Montréal, Montreal, QC, CA

4 Department of Neuropsychology, Ruhr University Bochum, Bochum, Germany

5 Erwin L. Hahn Institute for Magnetic Resonance Imaging, University of Duisburg-Essen, Essen, Germany

6 Institute of Neuroscience, Université Catholique de Louvain, Bruxelles, Belgium

7 Visual and Cognitive Neuroscience Laboratory (VCN Lab), The Department of Psychology, Ariel University, Ariel, Israel

8 Montreal Neurological Institute, McGill University, Montreal, QC, Canada

9 Department of Applied Mathematics and Computer Science Visual Computing, Danish Technical University, Kongens Lyngby, Denmark

This appendix contains all supporting tables referenced in the main text.

Tables are labeled as Table A-Table H

**Table A. Results from ANCOVAs for each hippocampal subdivisions and for hippocampal tail.**

| Subdivisions | F(2,40) | p | pbonf | n2p |
| --- | --- | --- | --- | --- |
| Left Hemisphere | | | | |
| CA1 | 0.672 | 0.515 | 1.000 | 0.032 |
| DG/CA3 | 1.428 | 0.252 | 0.756 | 0.067 |
| Subiculum | 2.081 | 0.138 | 0.414 | 0.094 |
| Right Hemisphere | | | | |
| CA1 | 0.654 | 0.526 | 1.000 | 0.032 |
| DG/CA3 | 1.664 | 0.202 | 0.607 | 0.077 |
| Subiculum | 0.009 | 0.991 | 1.000 | 0.000 |
| Hippocampal Tail | | | | |
| Left | 0.108 | 0.898 | 1.000 | 0.005 |
| Right | 0.144 | 0.866 | 1.000 | 0.007 |

**Table B. Partial Pearson r Correlation Tests between hippocampal subdivision volumes and pointing scores.**

|  | EB | | | LB | | | SC | | |
| --- | --- | --- | --- | --- | --- | --- | --- | --- | --- |
| Subdivisions | r | p | pbonf | r | p | pbonf | r | p | pbonf |
| Left Hemisphere | | | | | | | | | |
| CA1 | 0.266 | 0.429 | 1.000 | 0.141 | 0.680 | 1.000 | 0.382 | 0.144 | 0.433 |
| DG/CA3 | 0.198 | 0.559 | 1.000 | -0.207 | 0.541 | 1.000 | 0.301 | 0.258 | 0.774 |
| Subiculum | 0.318 | 0.341 | 1.000 | 0.375 | 0.256 | 0.767 | 0.042 | 0.878 | 1.000 |
| Right Hemisphere | | | | | | | | | |
| CA1 | 0.123 | 0.719 | 1.000 | 0.036 | 0.917 | 1.000 | 0.377 | 0.150 | 0.449 |
| DG/CA3 | 0.122 | 0.721 | 1.000 | 0.193 | 0.570 | 1.000 | 0.100 | 0.713 | 1.000 |
| Subiculum | 0.464 | 0.151 | 0.452 | 0.136 | 0.691 | 1.000 | 0.117 | 0.665 | 1.000 |

**Table C. Partial Pearson r Correlation Tests between hippocampal subdivision volumes and pointing learning rates.**

|  | EB | | | LB | | | SC | | |
| --- | --- | --- | --- | --- | --- | --- | --- | --- | --- |
| Subdivisions | r | p | pbonf | r | p | pbonf | r | p | pbonf |
| Left Hemisphere | | | | | | | | | |
| CA1 | 0.449 | 0.166 | 0.497 | -0.111 | 0.745 | 1.000 | 0.355 | 0.177 | 0.531 |
| DG/CA3 | 0.560 | 0.073 | 0.219 | -0.400 | 0.223 | 0.668 | 0.423 | 0.102 | 0.307 |
| Subiculum | 0.426 | 0.191 | 0.573 | 0.450 | 0.164 | 0.493 | 0.127 | 0.640 | 1.000 |
| Right Hemisphere | | | | | | | | | |
| CA1 | 0.324 | 0.332 | 0.995 | -0.071 | 0.837 | 1.000 | 0.456 | 0.076 | 0.228 |
| DG/CA3 | 0.309 | 0.356 | 1.000 | -0.160 | 0.639 | 1.000 | 0.376 | 0.151 | 0.453 |
| Subiculum | 0.718 | 0.013 | 0.039* | 0.114 | 0.737 | 1.000 | -0.015 | 0.955 | 1.000 |

**Table D. Partial Pearson r Correlation Tests between subiculum subdivision volumes and navigation performance.**

|  | EB | | | LB | | | SC | | |
| --- | --- | --- | --- | --- | --- | --- | --- | --- | --- |
| Subdivisions | r | p | pbonf | r | p | pbonf | r | p | pbonf |
| Left Hemisphere | | | | | | | | | |
| Sub-proper | 0.576 | 0.064 | 0.191 | 0.658 | 0.028 | 0.084 | 0.229 | 0.394 | 1.000 |
| Presub | 0.432 | 0.184 | 0.553 | 0.734 | 0.010 | 0.030* | -0.183 | 0.497 | 1.000 |
| Parasub | 0.005 | 0.989 | 1.000 | 0.538 | 0.088 | 0.264 | -0.221 | 0.411 | 1.000 |
| Right Hemisphere | | | | | | | | | |
| Sub-proper | 0.694 | 0.018 | 0.054 | 0.162 | 0.634 | 1.000 | 0.244 | 0.363 | 1.000 |
| Presub | 0.704 | 0.016 | 0.047* | 0.131 | 0.701 | 1.000 | -0.021 | 0.939 | 1.000 |
| Parasub | 0.300 | 0.369 | 1.000 | 0.451 | 0.164 | 0.492 | -0.087 | 0.750 | 1.000 |

**Table E. Partial Pearson r Correlation Tests between subiculum subdivision volumes and navigation learning rates.**

|  | EB | | | LB | | | SC | | |
| --- | --- | --- | --- | --- | --- | --- | --- | --- | --- |
| Subdivisions | r | p | pbonf | r | p | pbonf | r | p | pbonf |
| Left Hemisphere | | | | | | | | | |
| Sub-proper | 0.661 | 0.027 | 0.081 | 0.521 | 0.100 | 0.300 | 0.377 | 0.150 | 0.450 |
| Presub | 0.787 | 0.004 | 0.012* | 0.521 | 0.100 | 0.301 | 0.473 | 0.064 | 0.192 |
| Parasub | 0.597 | 0.053 | 0.159 | 0.249 | 0.461 | 1.000 | -0.173 | 0.522 | 1.000 |
| Right Hemisphere | | | | | | | | | |
| Sub-proper | 0.700 | 0.016 | 0.048* | 0.322 | 0.334 | 1.000 | 0.249 | 0.352 | 1.000 |
| Presub | 0.633 | 0.036 | 0.108 | 0.093 | 0.785 | 1.000 | 0.181 | 0.503 | 1.000 |
| Parasub | 0.630 | 0.038 | 0.114 | 0.324 | 0.331 | 0.993 | -0.216 | 0.423 | 1.000 |

**Table F. Partial Pearson r Correlation Tests between subiculum subdivision volumes and pointing scores.**

|  | EB | | | LB | | | SC | | |
| --- | --- | --- | --- | --- | --- | --- | --- | --- | --- |
| Subdivisions | r | p | pbonf | r | p | pbonf | r | p | pbonf |
| Left Hemisphere | | | | | | | | | |
| Sub-proper | 0.261 | 0.439 | 1.000 | 0.418 | 0.200 | 0.600 | 0.269 | 0.314 | 0.942 |
| Presub | 0.370 | 0.262 | 0.786 | 0.269 | 0.423 | 1.000 | -0.293 | 0.271 | 0.813 |
| Parasub | 0.029 | 0.932 | 1.000 | 0.229 | 0.499 | 1.000 | -0.170 | 0.530 | 1.000 |
| Right Hemisphere | | | | | | | | | |
| Sub-proper | 0.304 | 0.363 | 1.000 | 0.284 | 0.397 | 1.000 | 0.233 | 0.385 | 1.000 |
| Presub | 0.466 | 0.149 | 0.447 | 0.000 | 0.999 | 1.000 | -0.036 | 0.896 | 1.000 |
| Parasub | 0.411 | 0.209 | 0.627 | -0.104 | 0.760 | 1.000 | -0.030 | 0.911 | 1.000 |

**Table G. Partial Pearson r Correlation Tests between subiculum subdivision volumes and pointing learning rates.**

|  | EB | | | LB | | | SC | | |
| --- | --- | --- | --- | --- | --- | --- | --- | --- | --- |
| Subdivisions | r | p | pbonf | r | p | pbonf | r | p | pbonf |
| Left Hemisphere | | | | | | | | | |
| Sub-proper | 0.432 | 0.184 | 0.552 | 0.507 | 0.111 | 0.333 | 0.243 | 0.364 | 1.000 |
| Presub | 0.317 | 0.342 | 1.000 | 0.352 | 0.289 | 0.867 | -0.041 | 0.879 | 1.000 |
| Parasub | 0.260 | 0.440 | 1.000 | 0.144 | 0.672 | 1.000 | -0.104 | 0.703 | 1.000 |
| Right Hemisphere | | | | | | | | | |
| Sub-proper | 0.547 | 0.082 | 0.246 | 0.214 | 0.527 | 1.000 | 0.080 | 0.770 | 1.000 |
| Presub | 0.599 | 0.051 | 0.153 | 0.033 | 0.923 | 1.000 | -0.068 | 0.803 | 1.000 |
| Parasub | 0.649 | 0.031 | 0.093 | -0.112 | 0.743 | 1.000 | -0.216 | 0.421 | 1.000 |

**Table H. Results from the confidence interval (CI) bootstrapping and leave-one-out (LOO) analyses, performed for all significant main partial Pearson r correlation tests.**

| Group & Hippocampus region | r | p | Bootstrap 95% CI | Bootstrap mean r | LOO r range | LOO mean r | LOO % Significant |
| --- | --- | --- | --- | --- | --- | --- | --- |
| Navigation Performance | | | | | | | |
| EB Right Subiculum | 0.790 | .004 | [0.186, 0.994] | 0.758 | [0.712, 0.849] | 0.787 | 100% |
| EB Right DG/CA3 | 0.704 | .015 | [0.276, 0.990] | 0.752 | [0.637, 0.771] | 0.713 | 100% |
| LB Left Subiculum | 0.771 | .006 | [0.167, 0.998] | 0.771 | [0.657, 0.922] | 0.770 | 100% |
| EB Right Presub | 0.704 | .016 | [-0.064, 0.985] | 0.604 | [0.416, 0.838] | 0.690 | 93% |
| LB Left  Presub | 0.734 | .010 | [0.008, 0.997] | 0.739 | [0.658, 0.846] | 0.738 | 100% |
| Navigation Learning Rate | | | | | | | |
| EB Right Subiculum | 0.827 | .002 | [0.045, 0.998] | 0.760 | [0.757, 0.947] | 0.824 | 100% |
| EB Left Subiculum | 0.803 | .003 | [0.419, 0.997] | 0.803 | [0.745, 0.883] | 0.802 | 100% |
| EB Left  Presub | 0.787 | .004 | [0.263, 0.999] | 0.785 | [0.733, 0.925] | 0.788 | 100% |
| EB Right  Sub-proper | 0.700 | .016 | [-0.056, 0.992] | 0.733 | [0.545, 0.831] | 0.697 | 85% |
| Pointing Learning Rate | | | | | | | |
| EB Right Subiculum | 0.718 | .013 | [-0.498, 0.996] | 0.637 | [0.593, 0.802] | 0.711 | 100% |
